# Supplementary material
Source: HighWire-hosted journal article supplement (https://bmjleader.bmj.com/highwire/filestream/2089/field_highwire_adjunct_files/1/leader-2021-000518supp002_data_supplement.pdf)
Supplement: leader-2021-000518supp002_data_supplement.pdf [file leader-2021-000518supp002_data_supplement.pdf]

### Median scores by employment sector

| Score (0-100)                                                                         | All sectors (n=564) | NHS/ Health (n=305) | Social Care (n=95) | Local/national Government (n=83) | Education/ Childcare (n=50) | Other sectors (n=31) |
|---------------------------------------------------------------------------------------|---------------------|---------------------|--------------------|----------------------------------|-----------------------------|----------------------|
| How troubled by own actions                                                           | 3                   | 4                   | 1                  | 1                                | 1                           | 15                   |
| How troubled by others actions<br>(Kruskal-Wallis test across sectors<br>$p=0.0090$ ) | 52.5                | 58*<br>$p=0.0334$   | 55                 | 40                               | 30                          | 71*<br>$p=0.0408$    |
| Physical wellbeing<br>(Kruskal-Wallis test across sectors<br>$p=0.0008$ )             | 70                  | 70                  | 76                 | 67                               | 81**<br>$P<0.0001$          | 60                   |
| Mental wellbeing<br>(Kruskal-Wallis test across sectors<br>$p=0.0003$ )               | 52.5                | 50*<br>$p=0.0004$   | 59                 | 63**<br>$p=0.0472$               | 69.5**<br>$p=0.0082$        | 50                   |
| How connected with colleagues<br>(Kruskal-Wallis test across sectors<br>$p=0.00215$ ) | 54                  | 50                  | 70**<br>$p=0.0010$ | 50                               | 60                          | 59                   |
| How connected with family/<br>friends/ others                                         | 48                  | 46                  | 50                 | 42.5                             | 50                          | 42                   |

Higher scores are “worse” for moral injury but lower scores are “worse” for wellbeing/connectedness

Red type and \* denotes scores for significantly worse than respondents outside that sector and green or \*\* significantly better (where  $p<0.05$  using the Mann-Whitney test).

Before comparing individual sectors, the difference in scores across all employment sectors was investigated using the Kruskal-Wallis test (see first column).
